# Supplementary material for: The effect of crocetin (a saffron carotenoid) supplementation on antioxidant and inflammatory indexes and serum leptin concentration in patients with coronary artery disease
Source: Royal Society of Chemistry journal article supplement (doi:10.1039/d4fo03396e), 2025-01-01
Supplement: d4fo03396e1.pdf [file d4fo03396e1.pdf]

**Supplement Table 1.** Serum concentration of leptin, oxidative stress, inflammatory marker, blood pressure, and AIP of the study participants before and after 8 weeks of intervention

| Variables             | Crocetin group<br>(n=23) | Placebo group<br>(n=25) | P-value <sup>c</sup> | P-value <sup>d</sup> | P-value <sup>e</sup> |
|-----------------------|--------------------------|-------------------------|----------------------|----------------------|----------------------|
| <b>hs-CRP (ng/mL)</b> |                          |                         |                      |                      |                      |
| Baseline              | 487.72 ± 127.23          | 736.60 ± 513.97         | 0.006                | 0.695                | 0.695                |
| End of trial          | 368.09 ± 140.29          | 579.68 ± 257.46         | 0.002                |                      |                      |
| P-value <sup>a</sup>  | 0.0001                   | 0.021                   |                      |                      |                      |
| Mean difference       | -119.62 (83.20)          | -156.91 (471.95)        |                      |                      |                      |
| P-value <sup>b</sup>  | 0.0001                   | 0.109                   |                      |                      |                      |
| <b>SOD (U/ml)</b>     |                          |                         |                      |                      |                      |
| Baseline              | 257.52 ± 38.18           | 275.89 ± 35.96          | 0.049                | 0.520                | 0.520                |
| End of trial          | 299.24 ± 29.49           | 268.56 ± 22.04          | 0.0001               |                      |                      |
| P-value <sup>a</sup>  | 0.001                    | 0.716                   |                      |                      |                      |
| Mean difference       | 41.72 (45.72)            | -7.33 (49.67)           |                      |                      |                      |
| P-value <sup>b</sup>  | 0.0001                   | 0.468                   |                      |                      |                      |
| <b>MDA (nmol/ml)</b>  |                          |                         |                      |                      |                      |
| Baseline              | 9.74 ± 1.68              | 9.25 ± 1.10             | 0.54                 | 0.178                | 0.779                |
| End of trial          | 8.75 ± 1.22              | 9.09 ± 0.73             | 0.043                |                      |                      |
| P-value <sup>a</sup>  | 0.002                    | 0.909                   |                      |                      |                      |
| Mean difference       | -0.99 (1.83)             | -0.16 (1.12)            |                      |                      |                      |
| P-value <sup>b</sup>  | 0.017                    | 0.485                   |                      |                      |                      |
| <b>CAT (Unit/mL)</b>  |                          |                         |                      |                      |                      |
| Baseline              | 2.04 ± 0.61              | 2.24 ± 0.56             | 0.076                | 0.008                | 0.886                |
| End of trial          | 1.69 ± 0.35              | 2.58 ± 0.65             | 0.0001               |                      |                      |
| P-value <sup>a</sup>  | 0.094                    | 0.074                   |                      |                      |                      |
| Mean difference       | -0.34 (0.81)             | 0.33 (0.82)             |                      |                      |                      |
| P-value <sup>b</sup>  | 0.052                    | 0.055                   |                      |                      |                      |
| <b>Leptin (ng/mL)</b> |                          |                         |                      |                      |                      |
| Baseline              | 2.46 ± 0.96              | 0.73 ± 0.59             | 0.0001               | 0.854                | 0.854                |
| End of trial          | 0.59 ± 0.66              | 0.64 ± 0.52             | 0.38                 |                      |                      |
| P-value <sup>a</sup>  | 0.0001                   | 0.196                   |                      |                      |                      |
| Mean difference       | -1.86 (1.185)            | -0.09 (0.82)            |                      |                      |                      |
| P-value <sup>b</sup>  | 0.0001                   | 0.591                   |                      |                      |                      |
| <b>AIP</b>            |                          |                         |                      |                      |                      |
| Baseline              | 0.78 ± 0.29              | 0.55 ± 0.12             | 0.001                | 0.409                | 0.058                |
| End of trial          | 0.64 ± 0.26              | 0.59 ± 0.18             | 0.475                |                      |                      |
| P-value <sup>a</sup>  | 0.045                    | 0.367                   |                      |                      |                      |
| Mean difference       | -0.13 (0.25)             | 0.04 (0.20)             |                      |                      |                      |
| P-value <sup>b</sup>  | 0.017                    | 0.280                   |                      |                      |                      |
| <b>SBP</b>            |                          |                         |                      |                      |                      |
| Baseline              | 13.25 ± 0.88             | 14.18 ± 1.54            | 0.013                | 0.096                | 0.096                |
| End of trial          | 13.00 ± 0.86             | 14.31 ± 1.67            | 0.001                |                      |                      |
| P-value <sup>a</sup>  | 0.0001                   | 0.086                   |                      |                      |                      |
| Mean difference       | -0.25 (0.27)             | 0.13 (0.37)             |                      |                      |                      |
| P-value <sup>b</sup>  | 0.0001                   | 0.086                   |                      |                      |                      |
| <b>DBP</b>            |                          |                         |                      |                      |                      |

|                      |              |              |        |       |       |
|----------------------|--------------|--------------|--------|-------|-------|
| Baseline             | 8.89 ± 0.97  | 9.66 ± 1.13  | 0.013  |       |       |
| End of trial         | 8.60 ± 0.83  | 9.64 ± 1.06  | 0.0001 | 0.218 |       |
| P-value <sup>a</sup> | 0.004        | 0.943        |        |       |       |
| Mean difference      | -0.24 (0.35) | -0.01 (0.29) |        |       | 0.218 |
| P-value <sup>b</sup> | 0.003        | 0.789        |        |       |       |

SOD superoxide dismutase, CAT catalase, MDA malondialdehyde, hs-CRP high-sensitivity C-reactive protein, AIP the Atherogenic Index of Plasma, SBP systolic blood pressure, DBP diastolic blood pressure

\* Mean (SD)

P-value<sup>a</sup> P values denote the significance of within-group changes with (P< 0.05), paired t-test (for normal distribution data) and Wilcoxon test (for non-normal distribution data)

P-value <sup>b</sup> P values denote the significance of within-group mean difference, one sample test was used

P-value <sup>c</sup> P values denote the significance of between-group differences with (P< 0.05, Mann–Whitney U test (for all variables)

P-value <sup>d</sup> P values denote the significance of between-group differences with (P< 0.05), We used analysis of covariance (ANCOVA) to control confounders and baseline values such as age, gender, education, duration of disease, smoking, physical activity, history of disease, blood pressure, diabetes mellitus, dietary intake of energy, carbohydrate, protein, fat, BMI, W/H ratio and leptin, hs CRP, SOD at baseline)

P-value <sup>e</sup> P values denote the significance of the between-group mean difference with (P< 0.05), We used analysis of covariance (ANCOVA) to control confounders and baseline values such as age, gender, education, duration of disease, smoking, physical activity, history of disease, blood pressure, diabetes mellitus, dietary intake of energy, carbohydrate, protein, fat, BMI, W/H ratio and leptin, hs CRP, SOD at baseline)

**SupplementTable 2.** Basic anthropometric indices of patients with coronary artery disease

| Variables                     | Crocetin group<br>(n=23) | Placebo group<br>(n=25) | P-value <sup>c</sup> | P-value <sup>d</sup> | P-value <sup>e</sup> |
|-------------------------------|--------------------------|-------------------------|----------------------|----------------------|----------------------|
| <b>Weight (kg)</b>            |                          |                         |                      |                      |                      |
| Baseline                      | 81.17 ± 10.42            | 77.70 ± 9.46            | 0.341                | 0.195                | 0.014                |
| End of trial                  | 80.29 ± 10.32            | 77.68 ± 9.22            | 0.522                | 0.356                |                      |
| P-value <sup>a</sup>          | 0.0001                   | 0.5                     |                      |                      |                      |
| Mean difference               | -0.87±0.68               | -0.02±1.002             |                      |                      |                      |
| P-value <sup>b</sup>          | 0.0001                   | 0.921                   |                      |                      |                      |
| <b>WC (cm)</b>                |                          |                         |                      |                      |                      |
| Baseline                      | 92.60 ± 7.98             | 92.28 ± 8.71            | 0.853                | 0.480                | 0.08                 |
| End of trial                  | 91.33 ± 8.30             | 91.78 ± 8.48            | 0.951                | 0.593                |                      |
| P-value <sup>a</sup>          | 0.0001                   | 0.016                   |                      |                      |                      |
| Mean difference               | -1.269±0.813             | -0.5±1.02               |                      |                      |                      |
| P-value <sup>b</sup>          | 0.0001                   | 0.022                   |                      |                      |                      |
| <b>HC (cm)</b>                |                          |                         |                      |                      |                      |
| Baseline                      | 104.53 ± 8.60            | 101.12 ± 6.43           | 0.132                | 0.123                | 0.107                |
| End of trial                  | 104 ± 8.77               | 101.04 ± 6.15           | 0.179                | 0.172                |                      |
| P-value <sup>a</sup>          | 0.001                    | 0.723                   |                      |                      |                      |
| Mean difference               | -0.526±0.662             | -0.08±1.115             |                      |                      |                      |
| P-value <sup>b</sup>          | 0.001                    | 0.723                   |                      |                      |                      |
| <b>BMI (kg/m<sup>2</sup>)</b> |                          |                         |                      |                      |                      |
| Baseline                      | 28.07 ± 1.87             | 27.14 ± 2.70            | 0.13                 | 0.228                | 0.017                |
| End of trial                  | 27.76 ± 1.81             | 27.15 ± 2.76            | 0.18                 | 0.441                |                      |
| P-value <sup>a</sup>          | 0.0001                   | 0.435                   |                      |                      |                      |
| Mean difference               | -0.306±0.255             | 0.008±0.338             |                      |                      |                      |
| P-value <sup>b</sup>          | 0.0001                   | 0.903                   |                      |                      |                      |
| <b>WHR</b>                    |                          |                         |                      |                      |                      |
| Baseline                      | 0.88 ± 0.05              | 0.91 ± 0.05             | 0.104                | 0.403                | 0.861                |
| End of trial                  | 0.87 ± 0.05              | 0.90 ± 0.04             | 0.05                 | 0.360                |                      |
| P-value <sup>a</sup>          | 0.0001                   | 0.058                   |                      |                      |                      |
| Mean difference               | -0.008±0.006             | -0.004±0.011            |                      |                      |                      |
| P-value <sup>b</sup>          | 0.0001                   | 0.058                   |                      |                      |                      |

BMI body mass index, HC hip circumference, WC waist circumference, WHR waist/hip ratio

\* Mean (SD)

P-value<sup>a</sup> indicate the significance of within-group changes, with P < 0.05. Analyses were conducted using the paired t-test for normally distributed data and the Wilcoxon test for non-normally distributed data.

P-value <sup>b</sup> indicates the significance of within-group mean difference, one sample test was used.

P-value <sup>c</sup> indicates the significance of between-group differences with P< 0.05, Independent Samples t-test for normal distribution data, and Mann–Whitney U test for non-normal distribution data.

P-value <sup>d</sup> indicates the significance of between-group differences, with P < 0.05. We used analysis of covariance (ANCOVA) to control confounders and baseline values such as age, gender, education, physical activity, smoking status, blood pressure, and dietary intake (energy, carbohydrates, protein, fat), as well as baseline value of leptin, high-sensitivity C-reactive protein (hs-CRP), and superoxide dismutase (SOD).

P-value <sup>e</sup> indicates the significance of between-group mean differences, with P < 0.05. We used analysis of covariance (ANCOVA) to control confounders and baseline values such as age, gender, education, physical

activity, smoking status, blood pressure, and dietary intake (energy, carbohydrates, protein, fat), as well as baseline value of leptin, high-sensitivity C-reactive protein (hs-CRP), and superoxide dismutase (SOD).

**Supplement Table 3.** Energy and macronutrient intake of patients with coronary artery disease

| Variables                    | Crocetin group<br>(n=23) | Placebo group<br>(n=25) | P-value <sup>c</sup> | P-value <sup>d</sup> | P-value <sup>e</sup> |
|------------------------------|--------------------------|-------------------------|----------------------|----------------------|----------------------|
| <b>Energy</b><br>(kcal/day)  |                          |                         |                      |                      |                      |
| Baseline                     | 2623.86 ± 265.32         | 2478.07 ± 303.10        | 0.067                | 0.027                | 0.012                |
| End of trial                 | 2511.55 ± 295.32         | 2465.07 ± 288.64        | 0.812                | 0.332                |                      |
| P-value <sup>a</sup>         | 0.0001                   | 0.231                   |                      |                      |                      |
| Mean difference              | -112.303±69.829          | -13.004±68.941          |                      |                      |                      |
| P-value <sup>b</sup>         | 0.0001                   | 0.231                   |                      |                      |                      |
| <b>Protein</b> (g/d)         |                          |                         |                      |                      |                      |
| Baseline                     | 70.24 ± 11.70            | 68.10 ± 9.41            | 0.541                | 0.315                | 0.002                |
| End of trial                 | 65.85 ± 11.81            | 67.78 ± 9.32            | 0.375                | 0.886                |                      |
| P-value <sup>a</sup>         | 0.0001                   | 0.242                   |                      |                      |                      |
| Mean difference              | -4.393±3.436             | -0.322±1.758            |                      |                      |                      |
| P-value <sup>b</sup>         | 0.0001                   | 0.242                   |                      |                      |                      |
| <b>Carbohydrate</b><br>(g/d) |                          |                         |                      |                      |                      |
| Baseline                     | 385.10 ± 42.96           | 365.47 ± 44.65          | 0.177                | 0.047                | 0.268                |
| End of trial                 | 367.23 ± 46.44           | 359.99 ± 52.09          | 0.984                | 0.415                |                      |
| P-value <sup>a</sup>         | 0.0001                   | 0.183                   |                      |                      |                      |
| Mean difference              | -17.869±10.699           | -5.474±20.481           |                      |                      |                      |
| P-value <sup>b</sup>         | 0.0001                   | 0.183                   |                      |                      |                      |
| <b>Fat</b> (g/d)             |                          |                         |                      |                      |                      |
| Baseline                     | 89.16 ± 6.76             | 82.64 ± 11.29           | 0.014                | 0.005                | 0.336                |
| End of trial                 | 86.57 ± 8.68             | 82.00 ± 10.89           | 0.117                | 0.08                 |                      |
| P-value <sup>a</sup>         | 0.002                    | 0.225                   |                      |                      |                      |
| Mean difference              | -2.583±3.424             | -0.638±2.563            |                      |                      |                      |
| P-value <sup>b</sup>         | 0.002                    | 0.225                   |                      |                      |                      |

\* Mean (SD)

P-value<sup>a</sup> indicates the significance of within-group changes, with P < 0.05. Analyses were conducted using the paired t-test for normally distributed data and the Wilcoxon test for non-normally distributed data.

P-value <sup>b</sup> indicates the significance of within-group mean difference, one sample test was used.

P-value <sup>c</sup> indicates the significance of between-group differences with P< 0.05, Independent Samples t-test for normal distribution data, and or Mann–Whitney U test for non-normal distribution data.

P-value <sup>d</sup> indicates the significance of between-group differences, with P < 0.05. We used analysis of covariance (ANCOVA) to control confounders and baseline values such as age, gender, education, physical activity, smoking status, blood pressure, disease history, disease duration, and WHR, as well as baseline value of leptin, high-sensitivity C-reactive protein (hs-CRP), and superoxide dismutase (SOD).

P-value <sup>e</sup> indicates the significance of between-group mean differences, with P < 0.05. We used analysis of covariance (ANCOVA) to control confounders and baseline values such as age, gender, education, physical activity, smoking status, blood pressure, disease history, disease duration, and WHR, as well as baseline value of leptin, high-sensitivity C-reactive protein (hs-CRP), and superoxide dismutase (SOD).

**Table 4.** Serum concentration of leptin, oxidative stress, inflammatory marker, blood pressure, and AIP of the study participants before and after 8 weeks of intervention

| Variables             | Crocetin group<br>(n=23) | Placebo group<br>(n=25) | P-value <sup>c</sup> | P-value <sup>d</sup> | P-value <sup>e</sup> |
|-----------------------|--------------------------|-------------------------|----------------------|----------------------|----------------------|
| <b>hs-CRP (ng/mL)</b> |                          |                         |                      |                      |                      |
| Baseline              | 487.72 ± 127.23          | 736.60 ± 513.97         | 0.006                |                      |                      |
| End of trial          | 368.09 ± 140.29          | 579.68 ± 257.46         | 0.002                | 0.695                |                      |
| P-value <sup>a</sup>  | 0.0001                   | 0.021                   |                      |                      |                      |
| Mean difference       | -119.62 (83.20)          | -156.91 (471.95)        |                      |                      | 0.695                |
| P-value <sup>b</sup>  | 0.0001                   | 0.109                   |                      |                      |                      |
| <b>SOD (U/ml)</b>     |                          |                         |                      |                      |                      |
| Baseline              | 257.52 ± 38.18           | 275.89 ± 35.96          | 0.049                |                      |                      |
| End of trial          | 299.24 ± 29.49           | 268.56 ± 22.04          | 0.0001               | 0.520                |                      |
| P-value <sup>a</sup>  | 0.001                    | 0.716                   |                      |                      |                      |
| Mean difference       | 41.72 (45.72)            | -7.33 (49.67)           |                      |                      | 0.520                |
| P-value <sup>b</sup>  | 0.0001                   | 0.468                   |                      |                      |                      |
| <b>MDA (nmol/ml)</b>  |                          |                         |                      |                      |                      |
| Baseline              | 9.74 ± 1.68              | 9.25 ± 1.10             | 0.54                 |                      |                      |
| End of trial          | 8.75 ± 1.22              | 9.09 ± 0.73             | 0.043                | 0.178                |                      |
| P-value <sup>a</sup>  | 0.002                    | 0.909                   |                      |                      |                      |
| Mean difference       | -0.99 (1.83)             | -0.16 (1.12)            |                      |                      | 0.779                |
| P-value <sup>b</sup>  | 0.017                    | 0.485                   |                      |                      |                      |
| <b>CAT (Unit/mL)</b>  |                          |                         |                      |                      |                      |
| Baseline              | 2.04 ± 0.61              | 2.24 ± 0.56             | 0.076                |                      |                      |
| End of trial          | 1.69 ± 0.35              | 2.58 ± 0.65             | 0.0001               | 0.008                |                      |
| P-value <sup>a</sup>  | 0.094                    | 0.074                   |                      |                      |                      |
| Mean difference       | -0.34 (0.81)             | 0.33 (0.82)             |                      |                      | 0.886                |
| P-value <sup>b</sup>  | 0.052                    | 0.055                   |                      |                      |                      |
| <b>Leptin (ng/mL)</b> |                          |                         |                      |                      |                      |
| Baseline              | 2.46 ± 0.96              | 0.73 ± 0.59             | 0.0001               |                      |                      |
| End of trial          | 0.59 ± 0.66              | 0.64 ± 0.52             | 0.38                 | 0.854                |                      |
| P-value <sup>a</sup>  | 0.0001                   | 0.196                   |                      |                      |                      |
| Mean difference       | -1.86 (1.185)            | -0.09 (0.82)            |                      |                      | 0.854                |
| P-value <sup>b</sup>  | 0.0001                   | 0.591                   |                      |                      |                      |
| <b>AIP</b>            |                          |                         |                      |                      |                      |
| Baseline              | 0.78 ± 0.29              | 0.55 ± 0.12             | 0.001                |                      |                      |
| End of trial          | 0.64 ± 0.26              | 0.59 ± 0.18             | 0.475                | 0.409                |                      |
| P-value <sup>a</sup>  | 0.045                    | 0.367                   |                      |                      |                      |
| Mean difference       | -0.13 (0.25)             | 0.04 (0.20)             |                      |                      | 0.058                |
| P-value <sup>b</sup>  | 0.017                    | 0.280                   |                      |                      |                      |
| <b>SBP</b>            |                          |                         |                      |                      |                      |
| Baseline              | 13.25 ± 0.88             | 14.18 ± 1.54            | 0.013                |                      |                      |
| End of trial          | 13.00 ± 0.86             | 14.31 ± 1.67            | 0.001                | 0.096                |                      |
| P-value <sup>a</sup>  | 0.0001                   | 0.086                   |                      |                      |                      |
| Mean difference       | -0.25 (0.27)             | 0.13 (0.37)             |                      |                      | 0.096                |
| P-value <sup>b</sup>  | 0.0001                   | 0.086                   |                      |                      |                      |
| <b>DBP</b>            |                          |                         |                      |                      |                      |

|                      |              |              |        |       |       |
|----------------------|--------------|--------------|--------|-------|-------|
| Baseline             | 8.89 ± 0.97  | 9.66 ± 1.13  | 0.013  |       |       |
| End of trial         | 8.60 ± 0.83  | 9.64 ± 1.06  | 0.0001 | 0.218 |       |
| P-value <sup>a</sup> | 0.004        | 0.943        |        |       |       |
| Mean difference      | -0.24 (0.35) | -0.01 (0.29) |        |       | 0.218 |
| P-value <sup>b</sup> | 0.003        | 0.789        |        |       |       |

SOD superoxide dismutase, CAT catalase, MDA malondialdehyde, hs-CRP high-sensitivity C-reactive protein, AIP the Atherogenic Index of Plasma, SBP systolic blood pressure, DBP diastolic blood pressure

\* Mean (SD)

P-value<sup>a</sup> P values denote the significance of within-group changes with (P< 0.05), paired t-test (for normal distribution data) and Wilcoxon test (for non-normal distribution data)

P-value <sup>b</sup> P values denote the significance of within-group mean difference, one sample test was used

P-value <sup>c</sup> P values denote the significance of between-group differences with (P< 0.05, Mann–Whitney U test (for all variables)

P-value <sup>d</sup> P values denote the significance of between-group differences with (P< 0.05), We used analysis of covariance (ANCOVA) to control confounders and baseline values such as age, gender, education, duration of disease, smoking, physical activity, history of disease, blood pressure, diabetes mellitus, dietary intake of energy, carbohydrate, protein, fat, BMI, W/H ratio and leptin, hs CRP, SOD at baseline)

P-value <sup>e</sup> P values denote the significance of the between-group mean difference with (P< 0.05), We used analysis of covariance (ANCOVA) to control confounders and baseline values such as age, gender, education, duration of disease, smoking, physical activity, history of disease, blood pressure, diabetes mellitus, dietary intake of energy, carbohydrate, protein, fat, BMI, W/H ratio and leptin, hs CRP, SOD at baseline)
